the results of cardiovascular variables such as blood pressure and heart rate following spinal anesthesia, which usually blocks only the sympathetic nervous system. This information will provide us with important information for the anesthetic management of small infants whose cardiovascular homeostatic mechanisms could be vulnerable to inhaled anesthetics.<sup>10</sup>

SHUJI DOHI, M.D.

*Associate Professor of Anesthesiology  
Institute of Clinical Medicine  
University of Tsukuba*

HIDEKO SEINO, M.D.

*Chief Resident of Anesthesiology  
The University of Tsukuba Hospital  
Sakura-mura, Ibaraki 305, Japan*

#### REFERENCES

1. Harnik EV, Hoy GR, Potolicchio S, Stewart DR, Siegelman RE: Spinal anesthesia in premature infants recovering from respiratory distress syndrome. *ANESTHESIOLOGY* 64:95-99, 1986
2. Leigh MD, Belton MK: Pediatric anesthesia. *Anesth Analg* 35:1-17, 1956

3. Hunter AR: Second thoughts on spinal anesthesia. *Anesth Analg* 35:312-319, 1956
4. Blaise GA, Roy WL: Spinal anaesthesia for minor paediatric surgery. *Can Anaesth Soc J* 33:227-230, 1986
5. Dohi S, Naito H, Takahashi T: Age related changes in blood pressure and duration of motor block in spinal anesthesia. *ANESTHESIOLOGY* 50:319-323, 1979
6. Abajian C, Mellish PWP, Browne AF, Perkins FM, Lambert DH, Manuzan JE: Spinal anesthesia for surgery in the high risk infant. *Anesth Analg* 63:359-362, 1984
7. Gauthier P, Nadeau RA, deChamplain J: The development of sympathetic innervation and the function state of the cardiovascular system in newborn dogs. *Can J Physiol Pharmacol* 53:763-776, 1975
8. Buckley NM, Brazeau P, Gootman PM: Maturation of circulatory responses to adrenergic stimuli. *Fed Proc* 42:1643-1647, 1983
9. Assali NS, Brinkman GR III, Woods JR Jr, et al: Development of neurohumoral control of fetal, neonatal, and adult cardiovascular functions. *Am J Obstet Gynecol* 129:748-759, 1977
10. Wear R, Robinson S, Gregory GA: The effect of halothane on the baroreponse of adult and baby rabbits. *ANESTHESIOLOGY* 56:188-191, 1982
11. Berkowitz S, Greene BA: Spinal anesthesia in children: Report based on 350 patients under 13 years of age. *ANESTHESIOLOGY* 12:376-387, 1951

(Accepted for publication July 21, 1986.)

Anesthesiology  
65:560-561, 1986

*In reply:*—The excellent letter of Drs. Dohi and Seino refers to some of the most fascinating aspects of spinal anesthesia in the premature infant. Each factor mentioned in their discussion must contribute to the higher-dose requirement and shorter duration of tetracaine anesthesia. In addition, delayed myelination of the spinal cord and its surface area may cause the extremely rapid onset of this block. Blood levels of tetracaine have not been measured in infants, and the correlation between peak levels and the duration of analgesia is unknown.

Publications on spinal anesthesia in children emphasize the absence of adverse cardiovascular effects. In spite of this, Berkowitz and Green<sup>1</sup> consider preanesthetic vasopressor administration "always desirable although usually unnecessary." They inject neosynephrine to prevent retching from transient falls of blood pressure (BP). Their report on 350 cases includes only one child under 2 yr of age.

Singler<sup>2</sup> recommends hydration with 6 ml/kg Ringer's lactate prior to performing the block and uses urinary specific gravity as an indicator of hydration. Our fluid administration policy is similar, but more conservative in those infants who still retain fluid in their lungs.

In our report on 21 spinal anesthetics, we referred to the absence of cardiovascular instability. Currently, we have data on 30 patients. There were no instances of bradycardia. We see transient rises of 20 beats/min and at-

tribute this to excessive physical stimulation caused by positioning, prepping, draping, etc.

BP changes did not exceed 10 mmHg, with the exception of one 4,860-g infant whose systolic pressure dropped from 90 to 75 mmHg. This was not considered deleterious, and it self-corrected in 10 min without intervention. We did not observe any retching. Atropine was only given if general anesthesia supplement was required.

Abajian *et al.*<sup>3</sup> administered 29 spinal anesthetics to premature infants and in 16 of these, 0.01 ng epinephrine was added. Although they did not report specifically on pulse rate and BP change differences between these two groups, they report no bradycardia or hypotension. Thus, the possible systemic effect of absorbing epinephrine is unlikely to play any role in supporting cardiovascular stability.

Dr. Dohi reminds us that the sympathetic nervous system is incompletely developed at birth and the parasympathetic is dominant. This well-known feature of the infant's circulation is further accentuated in the premature infant.

Cardiac output is rate-dependent in early infancy. Atropine was not administered routinely in our series. With this in mind, had sympathetic blockade occurred, bradycardia and hypotension would have featured as Dr. Dohi suggests. It may well be that the immature sympathetic nerves are resistant to local anesthetics. There are

other similar pharmacologic responses in the perinatal period, for instance ketamine requirement is much greater in infants under 6 months of age, and Lockhart and Nelson<sup>4</sup> suggested changes in neuronal density, incomplete myelination, or impaired axonal transmission as possible explanations. One may speculate that a common factor relating to neural maturity could explain both the larger local anesthetic dose requirement and the subsequent absence of sympathetic blockade. Dr. Dohi and his group have shed some welcome light on this puzzling feature of spinal anesthesia in the very young.

EVA V. HARNIK, M.D.  
Department of Anesthesia  
Georgetown University Hospital

Anesthesiology  
65:561, 1986

### Clinical Significance of Perioperative T-wave Inversion

*To the Editor:*—Breslow *et al.*<sup>1</sup> showed that patients with perioperative T-wave changes did not have an increased incidence of adverse cardiac events in the immediate postoperative period. They did not present a long-term follow-up of these patients.

In a 1–2-yr follow-up of patients with unstable angina and new T-wave inversions of > 2 mm, a higher incidence of adverse cardiac events was observed by Haines *et al.*<sup>2</sup> Granborg *et al.*<sup>3</sup> found in a 3-yr follow-up that in patients suspected of acute myocardial infarctions, the number of leads with transient T-wave inversions as well as the sum of negative T-wave amplitudes significantly correlated with the rates of acute myocardial infarctions and death.

In the immediate postoperative period, most cardiac events are not associated with anginal pain. The patient with known or suspected coronary artery disease may have a significant intraoperative ischemic event leading to no externally detectable manifestations other than T-wave inversion.

In the study of Breslow *et al.*,<sup>1</sup> 40 out of 394 patients had known or suspected coronary artery disease. Although not stated in the report, it is likely that few or none of these patients had unstable angina. The incidence of significant ischemic events in the perioperative period under these circumstances is not known, but it is suspected

3800 Reservoir Road, N.W.  
Washington, D. C. 20007

### REFERENCES

1. Berkowitz S, Green B: Spinal anesthesia in children. *ANESTHESIOLOGY* 12:376–387, 1951
2. Singler RC: Pediatric regional anesthesia, *Pediatric Anesthesia*. Edited by Gregory GA. New York, Churchill Livingstone, 1983: pp 481–518
3. Abajian C, Mellish RWP, Browne AF, Perkins FM, Lambert DH, Mazuzan JE: Spinal anesthesia for surgery in the high risk infant. *Anesth Analg* 63:359–362, 1984
4. Lockhart CH, Nelson WL: The relationship of ketamine requirement to age in the pediatric patient. *ANESTHESIOLOGY* 40: 507–508, 1974

(Accepted for publication July 21, 1986.)

to be quite low. Nine of 40 patients who had new T-wave abnormalities did not have adverse cardiac events in the perioperative period. If they were to be followed for 2–3 yr, it is possible that they would have higher morbidity and mortality than the remaining 31 patients. In addition, if the sample size had been significantly greater than nine, perioperative ischemic events may also have been detected.

UDAY JAIN, M.D., PH.D.  
Assistant Professor  
Department of Anesthesia  
UMDNJ-Robert Wood Johnson Medical School  
New Brunswick, New Jersey 08903

### REFERENCES

1. Breslow MJ, Miller CF, Parker SD, Walman AT, Rogers MC: Changes in T wave morphology following anesthesia and surgery: A common recovery room phenomenon. *ANESTHESIOLOGY* 64:398–402, 1986
2. Haines DE, Raabe DS, Gundel WD, Wackers FJT: Anatomic and prognostic significance of new T wave inversion in unstable angina. *Am J Cardiol* 52:14–18, 1983
3. Granborg J, Grande P, Pedersen A: Diagnostic and prognostic implications of transient isolated negative T waves in suspected acute myocardial infarction. *Am J Cardiol* 57:203–207, 1986

(Accepted for publication July 21, 1986.)

Anesthesiology  
65:561–562, 1986

*In reply:*—Dr. Jain has questioned whether perioperative T-wave abnormalities are associated with late cardiac complications (1–3 yr postoperative). This suggestion is based on data demonstrating a relationship between late

cardiac complications and T-wave abnormalities in patients presenting with acute ischemic events (unstable angina, acute myocardial infarction).

Dr. Jain's comments are correct but not relevant to our
